# Supplementary material for: Augmented low-Dye tape alters foot mobility and neuromotor control of gait in individuals with and without exercise related leg pain
Source: J Foot Ankle Res. 2010 Mar 18;3:5. doi: 10.1186/1757-1146-3-5 (PMC2851667; doi:10.1186/1757-1146-3-5)
Supplement: Additional file 1 — ANOVA statistics. p values from GROUP by TIME repeated measure ANOVA. [file 1757-1146-3-5-S1.XLS]

## Sheet: Sheet1
VARIABLE	GROUP EFFECT	TIME EFFECT	GROUP x TIME INTERACTION EFFECT
TP Peak	0.112	0.125	0.533
TP Time to peak	0.974	0.823	0.275
TP Stance average	0.341	0.024	0.477
TP Swing average	0.754	0.173	0.363
TP Time of onset	0.937	0.329	0.673
TP Time of offset	0.049	0.065	0.171
TP Duration of activity	0.081	0.072	0.226
TA Peak Stance	0.489	0	0.241
TA Peak Swing	0.069	0.153	0.61
TA Time to peak stance	0.368	0.468	0.298
TA Time to peak swing	0.385	0.032	0.282
TA Stance average	0.838	0.004	0.518
TA Swing average	0.042	<0.001	0.73
TA Time of onset	0.502	0.205	0.458
TA Time of offset	0.172	0.286	0.393
TA Duration of activity	0.406	0.408	0.784
PL Peak	0.311	0.013	0.147
PL Time to peak	0.245	0.536	0.209
PL Stance average	0.185	0.002	0.049
PL Swing average	0.895	0.459	0.905
PL Time of onset	0.414	0.051	0.215
PL Time of offset	0.615	0.013	0.45
PL Duration of activity	0.514	0.857	0.257
MG Peak	0.224	0.008	0.335
MG Time to peak	0.098	<0.001	0.43
MG Stance average	0.15	0.003	0.556
MG Swing average	0.37	0.717	0.283
MG Time of onset	0.135	0.852	0.342
MG Time of offset	0.994	0.069	0.085
MG Duration of activity	0.116	0.123	0.046
LG Peak	0.062	0.326	0.845
LG Time to peak	0.9	<0.001	0.733
LG Stance average	0.412	0.628	0.541
LG Swing average	0.895	0.317	0.44
LG Time of onset	0.049	0.88	0.645
LG Time of offset	0.859	0.004	0.545
LG Duration of activity	0.057	0.324	0.943
SOL Peak	0.388	0.074	0.936
SOL Time to peak	0.632	0.076	0.441
SOL Stance average	0.16	0.052	0.807
SOL Swing average	0.652	0.796	0.811
SOL Time of onset	0.62	0.164	0.76
SOL Time of offset	0.956	0.406	0.947
SOL Duration of activity	0.734	0.439	0.712
VMO Peak Stance	0.21	0.056	0.387
VMO Peak Swing	0.924	0.528	0.099
VMO Time to peak stance	0.335	0.548	0.193
VMO Time to peak swing	0.29	0.198	0.131
VMO Stance average	0.121	0.099	0.625
VMO Swing average	0.235	0.027	0.17
VMO Time of onset	0.432	0.571	0.612
VMO Time of offset	0.724	0.415	0.145
VMO Duration of activity	0.886	0.341	0.455
VL Peak Stance	0.264	0.009	0.449
VL Peak Swing	0.325	0.343	0.87
VL Time to peak stance	0.302	0.456	0.283
VL Time to peak swing	0.851	0.385	0.051
VL Stance average	0.278	<0.001	0.793
VL Swing average	0.58	0.002	0.572
VL Time of onset	0.664	0.87	0.455
VL Time of offset	0.907	0.327	0.336
VL Duration of activity	0.711	0.568	0.689
RF Peak Stance	0.794	0.003	0.898
RF Peak Swing	0.72	0.133	0.424
RF Time to peak stance	0.35	0.047	0.431
RF Time to peak swing	0.162	0.02	0.545
RF Stance average	0.309	<0.001	0.314
RF Swing average	0.764	0.003	0.891
RF Time of onset	0.703	0.164	0.414
RF Time of offset	0.27	0.15	0.074
RF Duration of activity	0.356	0.043	0.778
ST Peak Stance	0.378	<0.001	0.105
ST Peak Swing	0.603	0.121	0.287
ST Time to peak stance	0.228	0.886	0.603
ST Time to peak swing	0.117	0.652	0.346
ST Stance average	0.41	<0.001	0.824
ST Swing average	0.245	<0.001	0.913
ST Time of onset	0.639	0.098	0.005
ST Time of offset	0.747	0.037	0.303
ST Duration of activity	0.675	0.017	0.064
BF Peak Stance	0.93	<0.001	0.1
BF Peak Swing	0.251	0.235	0.904
BF Time to peak stance	0.754	0.025	0.886
BF Time to peak swing	0.933	0.286	0.452
BF Stance average	0.73	<0.001	0.535
BF Swing average	0.364	0.23	0.717
BF Time of onset	0.561	0.962	0.83
BF Time of offset	0.733	0.139	0.859
BF Duration of activity	0.579	0.399	0.936
GM Peak Stance	0.11	0.055	0.384
GM Peak Swing	0.722	0.431	0.618
GM Time to peak stance	0.292	0.347	0.759
GM Time to peak swing	0.721	0.513	0.892
GM Stance average	0.057	0.104	0.355
GM Swing average	0.032	0.092	0.491
GM Time of onset	0.144	0.17	0.129
GM Time of offset	0.22	0.823	0.755
GM Duration of activity	0.311	0.773	0.399
Weight bearing arch height	0.524	<0.001	0.232
Non-weight bearing arch height	0.885	0.001	0.124
Weight bearing midfoot width	0.83	<0.001	0.134
Non-weight bearing midfoot width	0.695	<0.001	0.339
Arch height difference (NWB to WB)	0.46	<0.001	0.376
Mid-foot width difference (NWB toWB)	0.871	<0.001	0.224
Foot mobility magnitude	0.499	<0.001	0.636
Ankle sagittal plane minimum excursion	0.661	<0.001	0.278
Ankle sagittal plane maximum excursion	0.291	<0.001	0.651
Ankle sagittal plane total excursion	0.78	<0.001	0.443
Ankle transverse plane minimum excursion	0.135	<0.001	0.884
Ankle transverse plane maximum excursion	0.167	<0.001	0.732
Ankle transverse plane total excursion	0.938	0.005	0.845
Knee sagittal plane minimum excursion	0.667	0.045	0.714
Knee sagittal plane maximum excursion	0.524	<0.001	0.406
Knee sagittal plane total excursion	0.705	<0.001	0.596
Knee frontal plane minimum excursion	0.944	0.178	0.348
Knee frontal plane maximum excursion	0.917	0.039	0.324
Knee frontal plane total excursion	0.943	0.016	0.546
Knee transverse plane minimum excursion	0.486	0.037	0.293
Knee transverse plane maximum excursion	0.249	0.025	0.604
Knee transverse plane total excursion	0.453	<0.001	0.682
Hip sagittal plane minimum excursion	0.09	0.046	0.593
Hip sagittal plane maximum excursion	0.127	<0.001	0.345
Hip sagittal plane total excursion	0.989	<0.001	0.398
Hip frontal plane minimum excursion	0.273	<0.001	0.613
Hip frontal plane maximum excursion	0.266	0.339	0.841
Hip frontal plane total excursion	0.954	0.001	0.517
Hip transverse plane minimum excursion	0.438	0.001	0.859
Hip transverse plane maximum excursion	0.521	0.01	0.271
Hip transverse plane total excursion	0.085	<0.001	0.336
Pelvis sagittal plane minimum excursion	0.097	<0.001	0.139
Pelvis sagittal plane maximum excursion	0.073	0.045	0.307
Pelvis sagittal plane total excursion	0.14	<0.001	0.7
Pelvis frontal plane minimum excursion	0.294	0.546	0.663
Pelvis frontal plane maximum excursion	0.492	0.002	0.708
Pelvis frontal plane total excursion	0.95	0.005	0.898
Pelvis transverse plane minimum excursion	0.497	0.007	0.631
Pelvis transverse plane maximum excursion	0.946	0.012	0.355
Pelvis transverse plane total excursion	0.575	<0.001	0.67
