# Supplementary material for: Augmented low-Dye tape alters foot mobility and neuromotor control of gait in individuals with and without exercise related leg pain
Source: J Foot Ankle Res. 2010 Mar 18;3:5. doi: 10.1186/1757-1146-3-5 (PMC2851667; doi:10.1186/1757-1146-3-5)
Supplement: Additional file 3 — Effect of ALD tape on lower limb motion. Output from follow-up tests for TIME. Data based on pooled data from ERLP and control participants (n = 28). [file 1757-1146-3-5-S3.XLS]

## Sheet: Kinematics
			PRE-TAPE MEAN (SD)	TAPE MEAN (SD)	POST-TAPE MEAN (SD)	MEAN DIFFERENCE (95% CONFIDENCE INTERVAL) FOR TAPE TO PRE-TAPE	MEAN DIFFERENCE (95% CONFIDENCE INTERVAL) FOR POST-TAPE TO PRE-TAPE
Ankle	Sagittal	Minimum	-15.3 (4.8)	-10 (4.6)	-15.5 (5.2)	5.3 (3.9 to 6.7)*	-0.2 (-1.0 to 0.5)
		Maximum	15.5 (2.7)	17.5 (3.0)	15.7 (3.0)	2.0 (1.7 to 2.4)*	0.2 (-0.2 to 1.1)
		Total	30.8 (5.0)	27.7 (3.9)	31.2 (5.3)	-3.1 (-4.3 to -2.0)*	0.4 (-0.3 to 1.2)
	Transverse	Minimum	-20.1 (7.9)	-15.8 (9.1)	-20.8 (8.6)	4.3 (3.0 to 5.6)*	-0.7 (-1.4 to -0.1)*
		Maximum	7.5 (8.4)	11.6 (9.7)	8.5 (9.2)	4.1 (2.5 to 5.6)*	1.0 (0.3 to 1.7)*
		Total	27.7 (5.3)	27.4 (4.7)	29.4 (5.1)	-0.3 (-1.6 to 0.9)	1.7 (1.1 to 2.2)*
Knee	Sagittal	Minimum	5.1 (5.2)	4.7 (5.2)	4.6 (5.5)	-0.4 (-0.8 to 0.1)	-0.5 (-0.9 to 0.2)*
		Maximum	63.9 (5.7)	65.3 (5.9)	64.7 (5.4)	1.4 (0.8 to 2.0)*	0.8 (0.2 to 1.4)*
		Total	58.8 (3.6)	60.5 (4.3)	60.2 (4.0)	1.7 (0.8 to 2.5)*	1.4 (0.7 to 2.0)*
	Frontal	Minimum	-4.0 (6.2)	-4.4 (6.4)	-4.2 (6.3)	-0.4 (-0.8 to 0.1)	-0.2 (-0.7 to 0.3)
		Maximum	10.8 (7.8)	11.2 (7.8)	11.3 (7.9)	0.4 (-0.1 to 0.8)	0.5 (0.1 to 1.0)
		Total	14.8 (5.1)	15.5 (4.9)	15.5 (4.9)	0.7 (0.1 to 1.4)*	0.8 (0.1 to 1.4)
	Transverse	Minimum	-15.5 (9.2)	-15.5 (10.7)	-16.7 (9.6)	0.0 (-1.2 to 1.2)	-1.2 (-1.7 to -0.7)*
		Maximum	9.6 (9.4)	9.3 (10.3)	10.5 (9.6)	-0.3 (-1.3 to 0.8)	1.0 (0.2 to 1.7)*
		Total	25.1 (6.0)	24.8 (6.2)	27.2 (5.6)	-0.3 (-1.4 to 0.9)	2.2 (1.5 to 2.9)*
Hip	Sagittal	Minimum	-4.2 (6.7)	-4.3 (7.0)	-4.6 (6.7)	-0.1 (-0.5 to 0.2)	-0.4 (-0.8 to -0.1)
		Maximum	38.6 (7.7)	39.3 (7.4)	38.7 (7.4)	0.7 (0.4 to 1.0)*	0.2 (-0.3 to 0.6)
		Total	42.8 (4.0)	43.6 (3.9)	43.3 (3.7)	0.8 (0.5 to 1.2)*	0.6 (0.2 to 0.9)*
	Frontal	Minimum	-7.5 (3.3)	-7.4 (3.0)	-7.9 (3.1)	0.1 (-0.2 to 0.3)	-0.4 (-0.6 to -0.2)*
		Maximum	7.5 (2.9)	7.6 (3.1)	7.6 (3.0)	0.1 (-0.3 to 0.4)	0.2 (-0.1 to 0.5)
		Total	15.0 (2.9)	15.0 (3.0)	15.6 (2.8)	0.0 (-0.4 to 0.4)	0.6 (0.3 to 0.9)*
	Transverse	Minimum	-11.7 (9.0)	-12.6 (9.1)	-13.0 (9.1)	-0.9 (-1.4 to -0.5)*	-1.3 (-2.0 to -0.6)*
		Maximum	11.9 (8.6)	13.1 (8.5)	12.6 (8.5)	1.2 (0.4 to 2.0)*	0.7 (-0.1 to 1.6)
		Total	23.6 (7.6)	25.7 (7.4)	25.6 (7.4)	2.1 (1.3 to 3.0)*	2.0 (1.1 to 2.9)*
Pelvis	Sagittal	Minimum	10.9 (5.5)	10.4 (5.4)	10.3 (5.1)	-0.5 (-0.7 to -0.3)*	-0.6 (-0.9 to -0.3)*
		Maximum	13.5 (5.6)	13.6 (5.6)	13.4 (5.3)	0.1 (-0.1 to 0.4)	-0.1 (-0.4 to 0.3)
		Total	2.5 (0.6)	3.2 (0.6)	3.1 (0.7)	0.7 (0.5 to 0.8)*	0.6 (0.4 to 0.7)*
	Frontal	Minimum	-6.0 (1.9)	-6.0 (1.7)	-6.1 (1.9)	0.0 (-0.2 to 0.2)	-0.1 (-0.4 to 0.2)
		Maximum	4.9 (2.5)	5.2 (2.4)	5.2 (2.5)	0.3 (0.1 to 0.5)*	0.3 (0.1 to 0.5)*
		Total	10.9 (3.0)	11.2 (2.8)	11.3 (2.8)	0.3 (0.1 to 0.6)*	0.4 (0.1 to 0.7)*
	Transverse	Minimum	-4.8 (2.9)	-4.9 (2.7)	-5.4 (2.7)	-0.1 (-0.5 to 0.3)	-0.6 (-1.1 to -0.2)*
		Maximum	4.9 (2.3)	5.3 (2.4)	5.5 (2.4)	0.4 (0.1 to 0.9)	0.7 (0.2 to 1.1)*
		Total	9.6 (3.5)	10.2 (3.2)	10.9 (3.2)	0.6 (0.1 to 1.1)*	1.3 (0.8 to 1.7)*
* significant at the 0.025 level
Significant at the 0.05 level if confidence interval does not contain zero
All data is degrees of motion
