# Supplementary material for: Augmented low-Dye tape alters foot mobility and neuromotor control of gait in individuals with and without exercise related leg pain
Source: J Foot Ankle Res. 2010 Mar 18;3:5. doi: 10.1186/1757-1146-3-5 (PMC2851667; doi:10.1186/1757-1146-3-5)
Supplement: Additional file 4 — Effect of ALD tape on foot posture and mobility. Output from follow-up tests for TIME. Data based on pooled data from ERLP and control participants (n = 28). [file 1757-1146-3-5-S4.XLS]

## Sheet: Foot posture and mobility
VARIABLE	PRE-TAPE MEAN (SD)		TAPE MEAN (SD)		POST-TAPE MEAN (SD)		MEAN DIFFERENCE (95% CONFIDENCE INTERVAL)
	PRE-WALK	POST-WALK	PRE-WALK	POST-WALK	PRE-WALK	POST-WALK	EFFECT OF TAPE (PRE-WALK)	EFFECT OF TAPE (POST-WALK)	CARRYOVER EFFECT POST-TAPE REMOVAL (PRE-WALK)	CARRYOVER EFFECT POST-TAPE REMOVAL (POST-WALK)
Weight bearing arch height	6.26 (0.47)	6.22 (0.46)	6.80 (0.46)	6.56 (0.47)	6.31 (0.46)	6.28 (0.46)	0.58 (0.54 to 0.62)*	0.34 (0.30 to 0.39)*	0.09 (0.03 to 0.14)*	0.06 (0.01 to 0.12)*
Non-weight bearing arch height	7.40 (0.41)	7.37 (0.40)	7.48 (0.41)	7.45 (0.42)	7.48 (0.36)	7.46 (0.37)	0.11 (0.04 to 0.18)*	0.08 (0.02 to 0.13)*	0.11 (0.05 to 0.17)*	0.09 (0.03 to 0.14)*
Weight bearing midfoot width	7.54 (0.50)	7.55 (0.51)	7.30 (0.46)	7.41 (0.49)	7.45 (0.53)	7.49 (0.53)	-0.25 (-0.33 to -0.17)*	-0.14 (-0.20 to -0.08)*	-0.10 (-0.16 to -0.05)*	-0.06 (-0.10 to -0.01)*
Non-weight bearing midfoot width	6.80 (0.40)	6.77 (0.39)	6.96 (0.38)	7.02 (0.34)	6.78 (0.42)	6.77 (0.39)	0.19 (0.12 to 0.28)*	0.25 (0.17 to 0.33)*	0.01 (-0.06 to 0.09)	0.0 (-0.06 to 0.06)
Arch height difference (NWB to WB)	1.14 (0.34)	1.15 (0.35)	0.68 (0.31)	0.89 (0.31)	1.18 (0.31)	1.18 (0.39)	-0.47 (-0.54 to -0.40)*	-0.26 (-0.34 to -0.20)*	0.03 (-0.05 to 0.09)	0.03 (-0.05 to 0.09)
Mid-foot difference (NWB toWB)	0.75 (0.28)	0.78 (0.26)	0.33 (0.24)	0.40 (0.27)	0.66 (0.25)	0.73 (0.30)	-0.45 (-0.52 to -0.38)*	-0.38 (-0.47 to -0.31)*	-0.12 (-0.20 to -0.04)*	-0.05 (-0.13 to 0.02)
Foot mobility magnitude	1.38 (0.38)	1.42 (0.34)	0.79 (0.33)	1.00 (0.34)	1.37 (0.33)	1.40 (0.42)	-0.63 (-0.70 to -0.57)*	-0.42 (-0.49 to -0.35)*	-0.05 (-0.12 to 0.02)	-0.02 (-0.10 to 0.06)
* significant at the 0.025 level
Significant at the 0.05 level if confidence interval does not contain zero
All data is in centimeters
